# Supplementary material for: Socioeconomic Disparities in Patient-Reported Outcomes, Health Literacy, and Access to Care Among Patients With Primary Brain Tumors: Findings From the All of Us Research Program
Source: Research Square preprint supplement (doi:10.21203/rs.3.rs-7673638/v1), 2025-10-08
Supplement: Supplementary file 1 [file fa66241539f78eea29920fed.docx]

**Socioeconomic Disparities in Patient-Reported Outcomes, Health Literacy, and Access to Care Among Patients With Primary Brain Tumors: Findings From the All of Us Research Program**

Shailen G. Sampath, MSc.2; Alex Hernandez Manriquez2**;** Hannah Haile2; Miles Botkiss2;Chiemela Izima2; Arjun R. Adapa, MD, MS1; Nathan Shlobin, MD, MBA1; Michael G. Argenziano MD, MS1, Brian J. A. Gill, MD1

1 Department of Neurological Surgery, Columbia University, New York, NY, USA

2 Columbia Vagelos College of Physicians and Surgeons, Columbia University, New York, NY, USA

**Journal of Neuro-oncology**

**Supplemental Information:**

| **Standard Concepts** |
| --- |
| 1. Primary malignant neoplasm of brain |
| 2. Primary malignant neoplasm of pineal gland |
| 3. Primary malignant neoplasm of brain stem |
| 4. Primary malignant neoplasm of cerebellum |
| 5. Primary malignant neoplasm of cerebral ventricle |
| 6. Primary malignant neoplasm of cerebrum |
| 7. Primary malignant neoplasm of pituitary gland |
| 8. Primary malignant neoplasm of frontal lobe |
| 9. Primary malignant neoplasm of occipital lobe |
| 10. Primary malignant neoplasm of parietal lobe |
| 11. Primary malignant neoplasm of temporal lobe |

**Caption:** List of standardized Observational Medical Outcomes Partnership (OMOP) condition concept identifiers used to create our analysis group in the All of Us Database.
